# Supplementary material for: Bicolour electroluminescence of 2-(carbazol-9-yl)anthraquinone based on a solution process
Source: Royal Society of Chemistry journal article supplement (doi:10.1039/c7tc04444e), 2017-01-01
Supplement: c7tc04444e1.pdf [file c7tc04444e1.pdf]

## Supporting Information

### Bicolour electroluminescence of 2-(carbazol-9-yl)anthraquinone base on solution-process

Bin Huang,<sup>ab</sup> Zijing Li,<sup>b</sup> Hui Yang,<sup>b</sup> Die Hu,<sup>b</sup> Wenjing Wu,<sup>b</sup> Yan Feng,<sup>b</sup> Yueming Sun,<sup>\*a</sup> Baoping Lin<sup>a</sup> and

Wei Jiang<sup>\*a</sup>

<sup>a</sup> School of Chemistry and Chemical Engineering, Southeast University, Nanjing, Jiangsu, 211189, P. R. China.

\* E-mail: sun@seu.edu.cn (Y. Sun); E-mail: jiangw@seu.edu.cn (W. Jiang).

<sup>b</sup> College of Life Sciences and Chemistry, Jiangsu Key Laboratory of Biofunctional Molecule, Jiangsu Second Normal University, Nanjing, 210013, P. R. China.

### Table of Contents

#### 1. Experimental section

#### 2. Figures

#### 3. Tables

#### 4. References

## 1. Experimental section

### General information

All reactants and solvents were purchased from commercial sources, and were used without further purification. The solid UV–vis absorption spectra were recorded on a UV–Vis–Nir spectrophotometer (Cary 5000, Agilent). The photoluminescence (PL) spectra of the crystals were measured with a fluorospectrophotometer (FluoroMax–4, Horiba). The solid PL quantum efficiency was measured with an integrating sphere. The transient lifetime of the crystals were measured with a fluorospectrophotometer (FLS980, Edinburgh). Thermogravimetric analysis (TGA) and differential scanning calorimetry (DSC) were recorded on a Netzsch simultaneous thermal analyzer (STA) system (STA 409PC) and DSC 2910 modulated calorimetry under dry nitrogen atmosphere at a heating rate of 10 °C min<sup>-1</sup>. The X–ray diffraction (XRD) measurements were obtained through a diffractometer (Ultima IV) with an X-ray source of Cu K $\alpha$  at 40 kV and 40 mA, at a scan rate of 2° (2 $\theta$ ) per 1 min. Single crystal X–ray diffraction measurements were carried out on a Bruker D8 Venture diffractometer with MoK $\alpha$  radiation at 153 K. Single crystals were selected and mounted on a nylon loop in Paratone–N cryoprotectant. Unit cell determination was performed in the Bruker SMART APEX III software suite. The data sets were reduced and a multi–scan spherical absorption correction was implemented in the SCALE interface. CCDC 1573925 and 1573955 provide supplementary crystallographic data for this paper. <sup>1</sup>

### Preparation of crystals

Cz–AQ was synthesized according to the previously reported method.<sup>2</sup> A red needle–like crystal (R–crystal) was yielded from dichloromethane/hexane (V:V=1:2) solution at room temperature, and a yellow ribbon–like crystal (Y–crystal) was obtained by evaporation from dichloromethane/ethanol (V:V=1:1) solution at 80 °C. The single crystals were grown from dichloromethane/methanol (V:V=1:1) solution by slow evaporation.

### Device fabrication and performance measurements

Before device fabrication, indium–tin oxide (ITO)–coated glass substrates were pre–cleaned carefully and treated by UV ozone for 4 min. The hole–transporting layer of poly(3,4–ethylenedioxythiophene) doped with poly(styrene–4–sulfonate)(PEDOT:PSS) aqueous solution was spin–coated onto the ITO substrate and baked at 150 °C for 10 min to remove residue solvent. Then the emission layer (EML) of Cz–AQ in 1,2–dichloroethane (10 wt%, Device 1 ) or mixture of 1,2–dichloroethane and ethanol (V/V=1:1) (10 wt%, Device 2 ) was spin–coated onto the PEDOT:PSS layer and annealed at 80 °C for 30 min to exact the residual solvent in N<sub>2</sub> atmosphere. Subsequently, the substrate was transferred into an evaporation chamber, where 2,2',2''–(1,3,5–benzinetriyl) –tris(1–phenyl–*1H*–benzimidazole) (TPBI) was evaporated as electron–transporting layer. Finally, a 1 nm thick Cs<sub>2</sub>CO<sub>3</sub> and 100 nm thick Al were

evaporated as the metal cathode. The electroluminescent (EL) spectra and the Commission Internationale de l'Eclairage (CIE) coordinates were measured using a PR655 spectra colorimeter. The current density–voltage and brightness–voltage curves of the devices were measured using a Keithley 2400 source meter calibrated by a silicon photodiode. All the measurements were carried out at room temperature under ambient conditions. The external quantum efficiency (EQE) was calculated from the brightness, current density and EL spectrum assuming a Lambertian distribution.

## 2. Figures

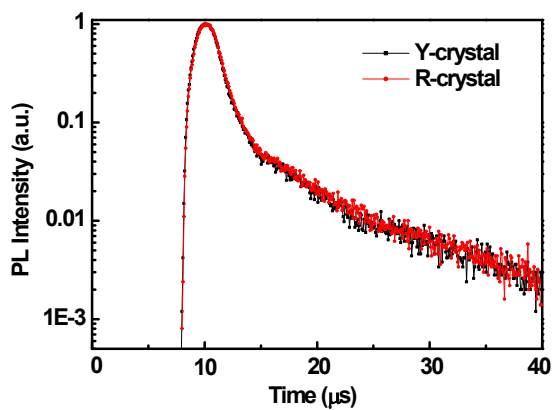

Fig. S1. Transient fluorescence decays of CZ-AQ CZ-AQ in different solid states at 300 K.

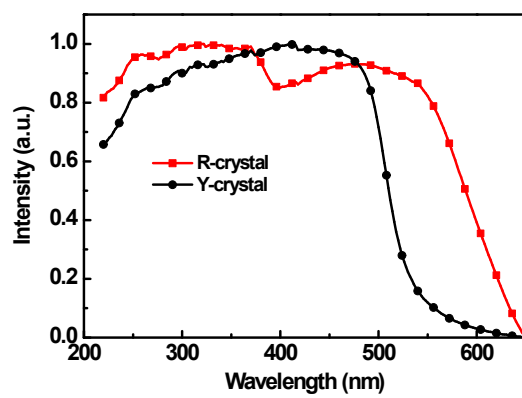

Fig. S2. UV-vis spectra of CZ-AQ in different solid states.

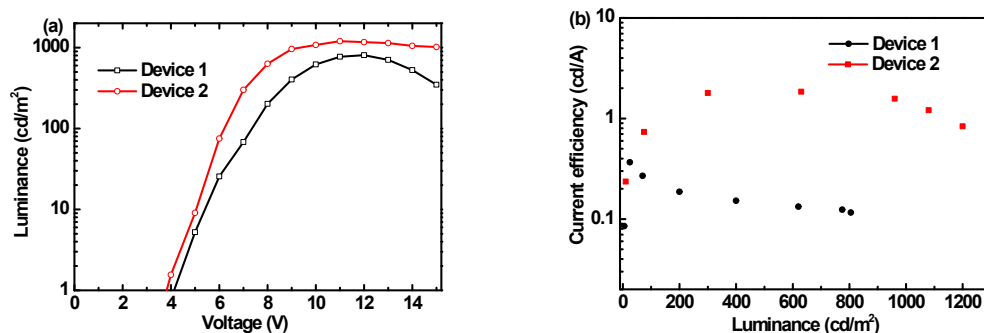

Fig. S3. (a) Luminance-voltage characteristics; (b) Current-efficiency versus luminance plots of the devices.

### 3. Tables

Table S1. Crystal data and structure refinement for CZ-AQ in different single crystals.

|                                 | R-single-crystal                                                                                                                  | Y-single-crystal                                                                                                                   |
|---------------------------------|-----------------------------------------------------------------------------------------------------------------------------------|------------------------------------------------------------------------------------------------------------------------------------|
| Formula                         | $C_{26}H_{15}NO_2$                                                                                                                | $C_{26}H_{15}NO_2$                                                                                                                 |
| CCDC No.                        | 1573955                                                                                                                           | 1573925                                                                                                                            |
| Formula weight                  | 373.39                                                                                                                            | 373.39                                                                                                                             |
| Space group                     | $P2_1/n$                                                                                                                          | $P2_1/n$                                                                                                                           |
| Temperature                     | 173(2)                                                                                                                            | 173(2)                                                                                                                             |
| Wavelength                      | 0.71073 Å                                                                                                                         | 0.71073 Å                                                                                                                          |
| Crystal system                  | Monoclinic                                                                                                                        | Monoclinic                                                                                                                         |
| Unit cell dimensions            | $a = 13.781(8)$ Å $\alpha = 90.00^\circ$<br>$b = 3.854(2)$ Å $\beta = 94.06(2)^\circ$<br>$c = 35.911(2)$ Å $\gamma = 90.00^\circ$ | $a = 16.073(4)$ Å $\alpha = 90.00^\circ$<br>$b = 8.072(3)$ Å $\beta = 117.88(7)^\circ$<br>$c = 16.193(4)$ Å $\gamma = 90.00^\circ$ |
| Volume                          | 1902.37 (19) Å <sup>3</sup>                                                                                                       | 1857.3 (9) Å <sup>3</sup>                                                                                                          |
| Z, Calculated density           | 4, 1.360 Mg/m <sup>3</sup>                                                                                                        | 4, 1.332 Mg/m <sup>3</sup>                                                                                                         |
| Absorption coefficient          | 0.089 mm <sup>-1</sup>                                                                                                            | 0.084 mm <sup>-1</sup>                                                                                                             |
| $F(000)$                        | 808                                                                                                                               | 772                                                                                                                                |
| Crystal size                    | 0.12 × 0.18 × 0.24 mm                                                                                                             | 0.10 × 0.20 × 0.30 mm                                                                                                              |
| Theta range for data collection | 2.18 to 27.44 deg.                                                                                                                | 2.87 to 27.65 deg                                                                                                                  |
| Limiting indices                | -17 ≤ h ≤ 17, 0 ≤ k ≤ 4, 0 ≤ l ≤ 46                                                                                               | -20 ≤ h ≤ 20, -10 ≤ k ≤ 9, -16 ≤ l ≤ 19                                                                                            |
| Reflections collected / unique  | 4282 / 3491 [ $R_{int} = 0.0685$ ]                                                                                                | 4331 / 2360 [ $R_{int} = 0.0719$ ]                                                                                                 |

|                                      |                                  |                                  |
|--------------------------------------|----------------------------------|----------------------------------|
| Max. and min. transmission           | 0.746 and 0.674                  | 0.992 and 0.980                  |
| Final R indices [ $I > 2\sigma(I)$ ] | $R_1 = 0.0685$ , $wR_2 = 0.2159$ | $R_1 = 0.0745$ , $wR_2 = 0.2209$ |

**Table S2.** EL characteristics of solution-processed non-doped OLEDs based on Cz-AQ.

|                       | V (v) | LE (cd A <sup>-1</sup> ) | Max luminance<br>(cd m <sup>-2</sup> ) | Max EQE | $\lambda_{\text{EL}}$ (nm) | CIE (x, y)   |
|-----------------------|-------|--------------------------|----------------------------------------|---------|----------------------------|--------------|
| Device 1 <sup>a</sup> | 4.3   | 0.37                     | 850                                    | 0.75%   | 680                        | (0.68, 0.30) |
| Device 2 <sup>b</sup> | 3.8   | 1.85                     | 1200                                   | 1.15%   | 600                        | (0.50, 0.42) |

<sup>a</sup> The emission layer (EML) of Cz-AQ in 1,2-dichloroethane (10 wt%).

<sup>b</sup> EML of Cz-AQ in the mixture of 1,2-dichloroethane and ethanol (V/V=1:1) (10 wt%).

### 3. References

1. CCDC 1573925 (Y-crystal) and CCDC 1573955 (R-crystal) contain the supplementary crystallographic data for this paper. These data can be obtained free of charge from The Cambridge Crystallographic Data Centre via [www.ccdc.cam.ac.uk/data\\_request/cif](http://www.ccdc.cam.ac.uk/data_request/cif).
2. B. Huang, Y. Ji, Z. Li, N. Zhou, W. Jiang, Y. Feng, B. Lin, Y. Sun, J. Lumin, 2017, **187**, 414
